# Supplementary material for: Protein phosphatase 2A regulatory subunit B55α functions in mouse oocyte maturation and early embryonic development
Source: PubMed Central journal article supplement (PMC5432312; doi:10.18632/oncotarget.15927), 2017-03-06
Supplement: oncotarget-08-26979-s001.pdf [file oncotarget-08-26979-s001.pdf]

# Protein phosphatase 2A regulatory subunit B55 $\alpha$ functions in mouse oocyte maturation and early embryonic development

## Supplementary Materials

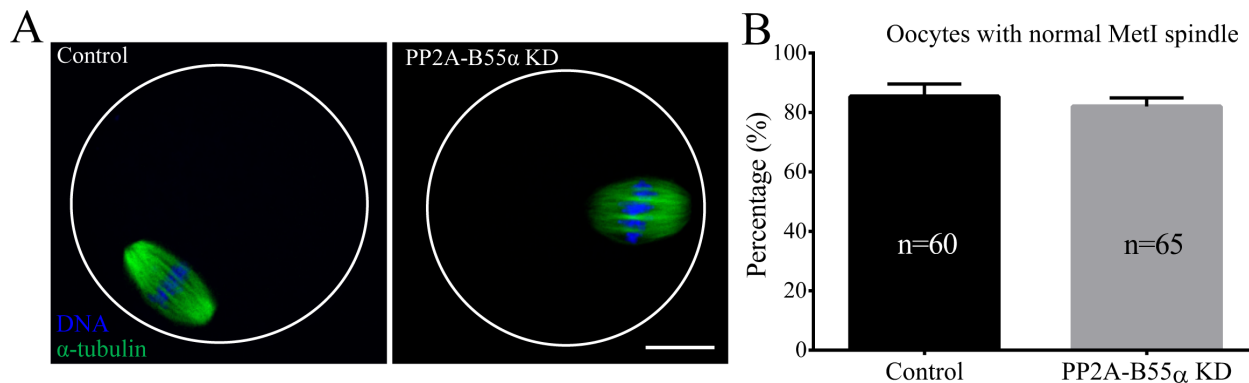

**Supplementary Figure 1: PP2A-B55 $\alpha$  knock down does not affect spindle formation at the MI stage.** (A) Oocytes at the MI stage were stained with an anti- $\alpha$ -tubulin antibody. (B) Percentage of oocytes with a normal spindle at the MI stage. Blue, DNA; green,  $\alpha$ -tubulin. Bar = 20  $\mu$ m. The data are the mean  $\pm$  SD of three independent experiments.

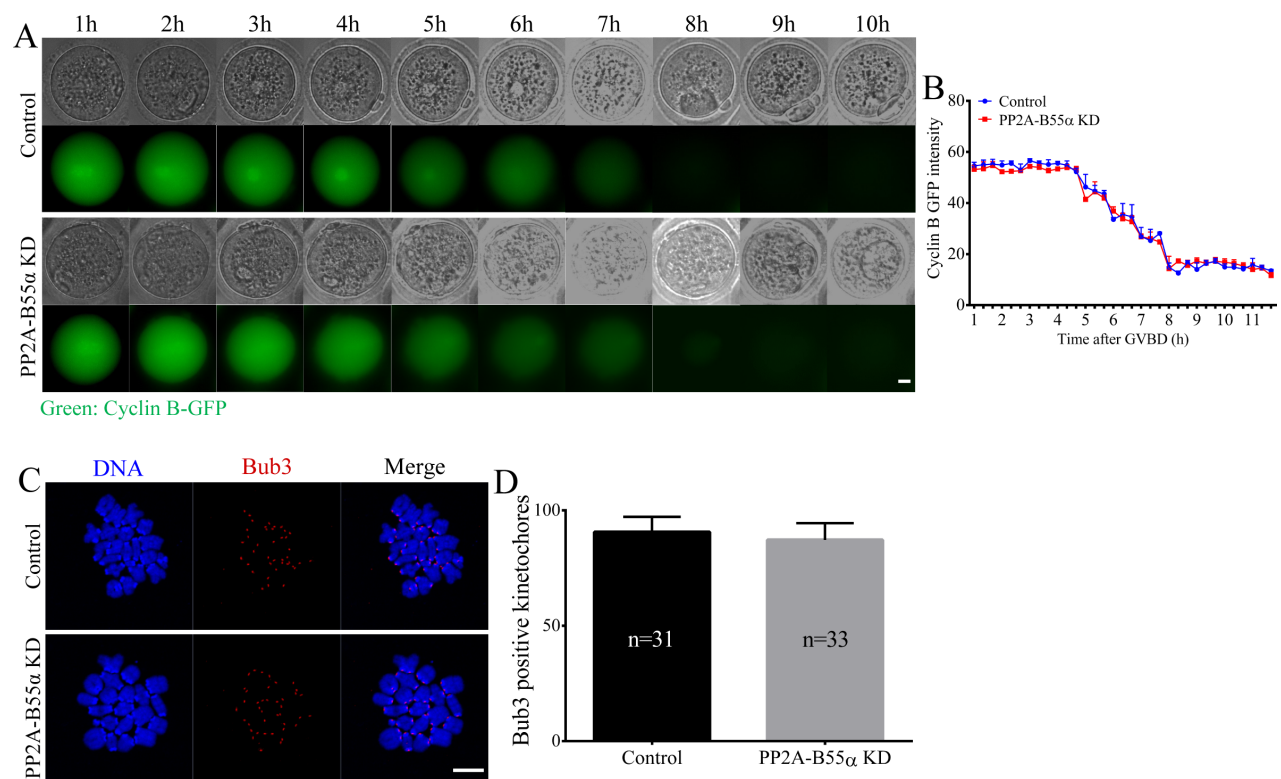

**Supplementary Figure 2: SAC activity in PP2A-B55 $\alpha$  knock down oocytes.** (A) Time-lapse live-cell imaging of PP2A-B55 $\alpha$ -KD oocytes expressing cyclin B-GFP mRNA. Time points indicate the culture duration. GFP levels were measured every 15 min. (B) Quantification of cyclin B-GFP levels. Green: cyclin B-GFP. Bar = 20  $\mu$ m. (C) Oocytes at the MI stage were stained with a Bub3 antibody. (D) Percentage of Bub3 positive kinetochores in the MI stage oocyte. Blue, DNA; red, Bub3. Bar = 20  $\mu$ m. The data are the mean  $\pm$  SD of three independent experiments.

### Supplementary Table 1: Primers used in this study

| Gene                               | Primer sequence                                      | Use of the primer |
|------------------------------------|------------------------------------------------------|-------------------|
| <i>PP2A-B55<math>\alpha</math></i> | F: 5'GAATTAATACGACTCACTATAGGGAGAAGTGCCCCGATTTAGGCC3' | dsRNA             |
|                                    | R: 5'GAATTAATACGACTCACTATAGGGAGAACTGTGCCTGTCAGACCC3' |                   |
|                                    | F: 5'AGAGGAAGATGGAAGATATAGAG3'                       | qPCR              |
|                                    | R: 5'GAGTTGATGTGATAAGTGTGG3'                         |                   |
| <i>Ppia</i>                        | F: 5'CGCGTCTCCTTCGAGCTGTT3'                          | qPCR              |
|                                    | R: 5'TGTAAAGTCACCACCCTGGC3'                          |                   |

F: forward; R: reverse; dsRNA: double-stranded RNA; qPCR: quantitative PCR.
